# Supplementary material
Source: Elsevier journal article supplement (https://rcastoragev2.blob.core.windows.net/c0f171e25373e6260108f40f6f2593f3/mmc1.pdf)
Supplement: mmc1 [file mmc1.pdf]

**Cell Metabolism, Volume 25**

**Supplemental Information**

**Mitochondrial Protein Lipoylation  
and the 2-Oxoglutarate Dehydrogenase Complex  
Controls HIF1 $\alpha$  Stability in Aerobic Conditions**

**Stephen P. Burr, Ana S.H. Costa, Guinevere L. Grice, Richard T. Timms, Ian T. Lobb, Peter Freisinger, Roger B. Dodd, Gordon Dougan, Paul J. Lehner, Christian Frezza, and James A. Nathan**

**SUPPLEMENTARY INFORMATION:**

**Figure S1: Validation of the HIF1 $\alpha$ -GFP<sup>ODD</sup> reporter, mutagenesis of the KBM7 cells, and reconstitution of the OGDH or LIAS deficient cells (related to Figures 1 and 2).**

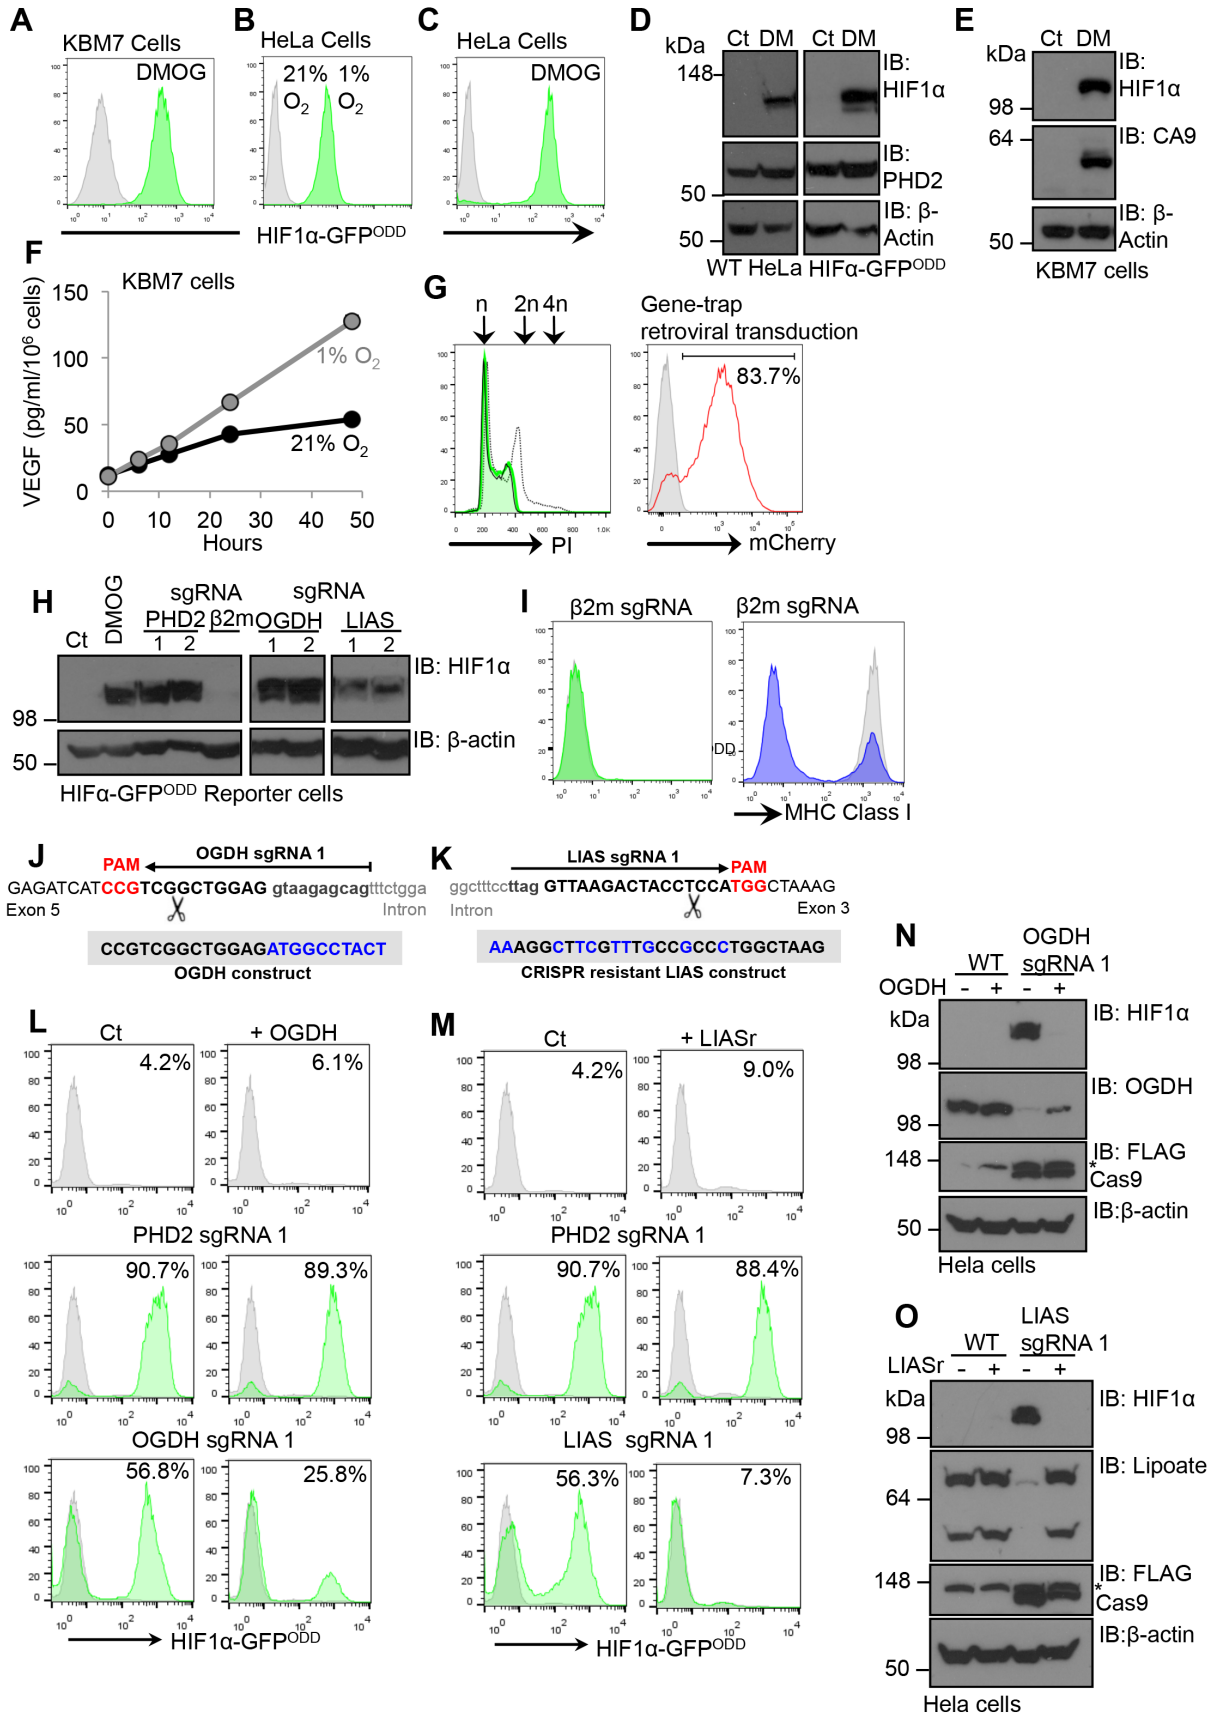

**A-C**, HIF1 $\alpha$ -GFP<sup>ODD</sup> reporter levels in KBM7 (**A**) and HeLa (**B, C**) cells exposed to 1% oxygen (**B**) or treated with 0.5 mM DMOG for 18 h (**A, C**). **D**, Immunoblot for HIF1 $\alpha$  and PHD2 levels in wildtype or HIF1 $\alpha$ -GFP<sup>ODD</sup> reporter HeLa cells treated with DMOG (DM) compared to untreated controls (Ct). **E, F**, Analysis of HIF1 transcriptional response in KBM7 cells measured by immunoblot for carbonic anhydrase 9 (CA9) levels (**E**), or by VEGF ELISA in supernatants following incubation in 21% or 1% oxygen for the indicated times (**F**). **G**, HIF1 $\alpha$ -GFP<sup>ODD</sup> KBM7 cells were confirmed to be near-haploid using Propidium Iodide (PI) staining (left, solid black line = haploid WT KBM7 cells, green = HIF1 $\alpha$ -GFP<sup>ODD</sup> KBM7 cells, dotted black = mixed haploid/diploid WT KBM7 cells), and mutagenised with the Z-loxP-mCherry gene-trap retrovirus (right). Approximately 80% of the cells were transduced with the virus. **H, I**, HIF1 $\alpha$ -GFP<sup>ODD</sup> reporter cells were lentivirally transduced with Cas9 and sgRNA to PHD2, OGDH, LIAS or  $\beta$ 2 microglobulin ( $\beta$ 2m). sgRNA-mediated depletion of  $\beta$ 2 microglobulin ( $\beta$ 2m) was used as a negative control. HIF1 $\alpha$  levels were measured by immunoblot (**A**). Flow cytometry analysis of cell surface MHC Class I levels confirmed  $\beta$ 2m depletion (**B**, right). CRISPR-Cas9 depletion of  $\beta$ 2m had no effect on GFP levels in the HIF1 $\alpha$ -GFP<sup>ODD</sup> reporter cells (**B**, left). **J, K**, Schematic of the OGDH and LIAS sgRNA designed to generate indels in endogenous OGDH (**J**) and LIAS (**K**). The protospacer adjacent motif (PAM) and Cas9 cleavage sites are highlighted. Overexpressed OGDH or LIAS (grey) are not efficiently cut by Cas9 as the OGDH guide binds to an intronic region, and silent mutations were incorporated into the LIAS construct (LIASr) to prevent sgRNA binding (bases not present in sgRNA are highlighted in blue). **L, M** Control (Ct) HIF1 $\alpha$ -GFP<sup>ODD</sup> reporter cells, or those stably expressing exogenous OGDH (**L**, right panels) or LIASr (**M**, right panels) were transduced with sgRNA to PHD2, OGDH or LIAS (shaded green). GFP accumulation was measured by flow cytometry after 10 days (% GFP<sup>HIGH</sup> are shown). **N, O** Endogenous HIF1 $\alpha$  levels in wildtype HeLas, or those overexpressing exogenous OGDH or LIASr, after CRISPR-Cas9 depletion of OGDH (**L**) or LIAS (**M**). FLAG-Cas9 levels measured by immunoblot. *\*non-specific band*.

**Figure S2: CRISPR/Cas9-mediated depletion of DLST and DLD stabilises HIF1 $\alpha$**  (related to Figure 2).

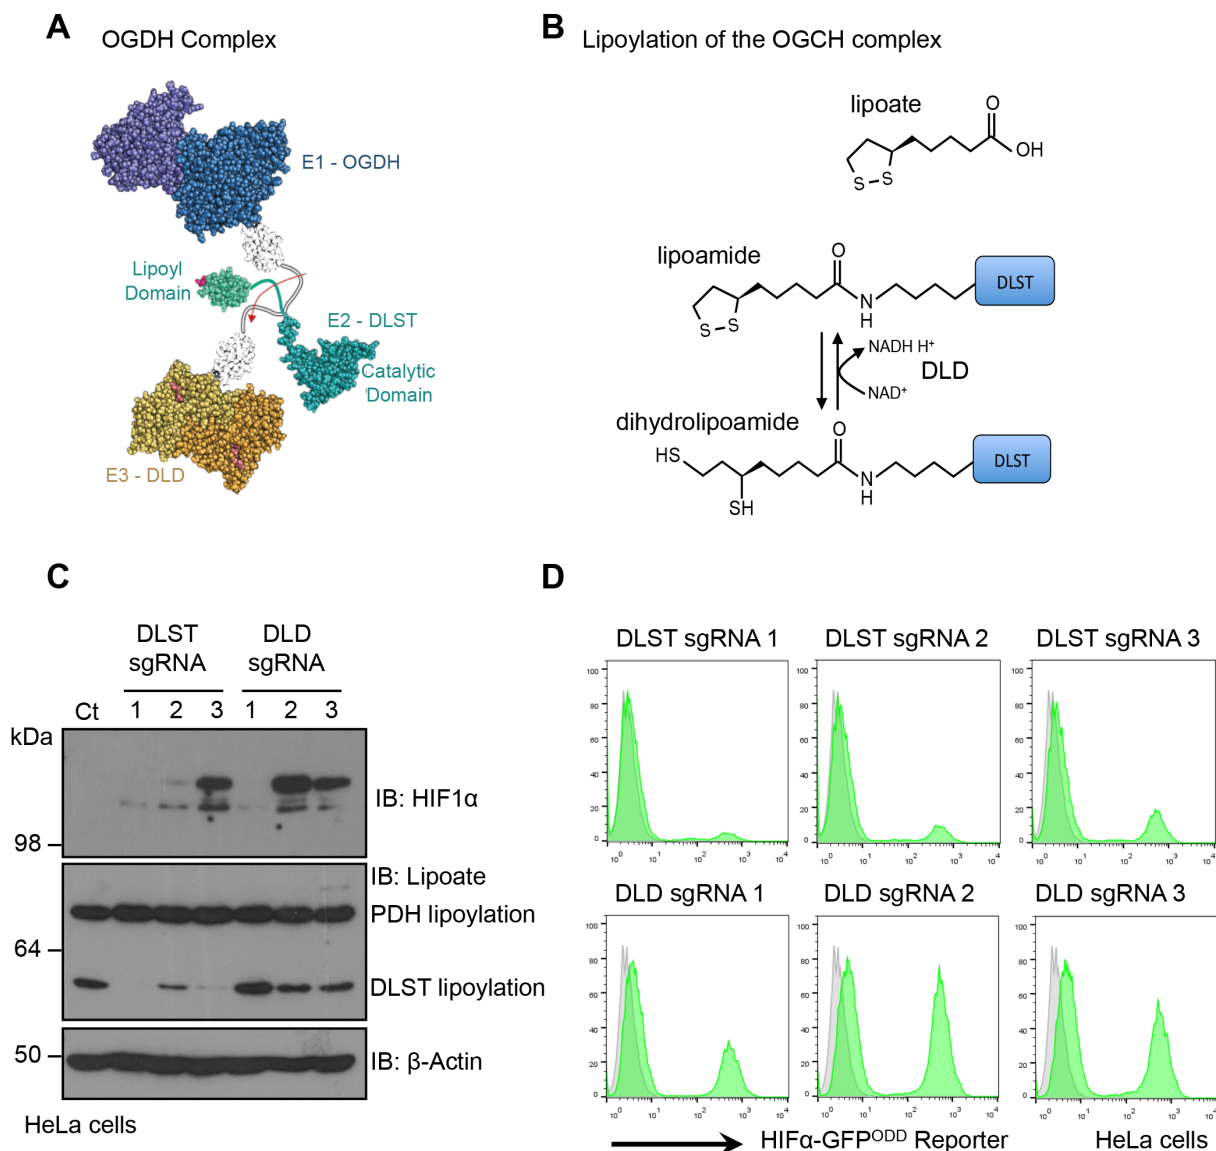

**A, B**, Lipoylation of the OGDHC. Structure of the OGDHC, indicating the position of the lipoyl domain on DLST (**A**). Lipoylation involves the conjugation of the lipoate molecule to a lysine residue within DLST, forming the lipoamide moiety (**B**). Catalytic activity of the OGDHC requires the formation of dihydrolipoamide on DLST, which is converted back to lipoamide by DLD in a NADH redox reaction (**B**). **C** and **D**, Wildtype (**C**) or HIF1 $\alpha$ -GFP<sup>ODD</sup> reporter HeLas (**D**) were transduced with sgRNA/Cas9 to DLST or DLD. 10 days post transduction, endogenous HIF1 $\alpha$  and HIF1 $\alpha$ -GFP<sup>ODD</sup> reporter fluorescence were measured by immunoblot or flow cytometry respectively.

**Figure S3: OGDH and LIAS depletion decreases PHD hydroxylation** (related to Figure 3).

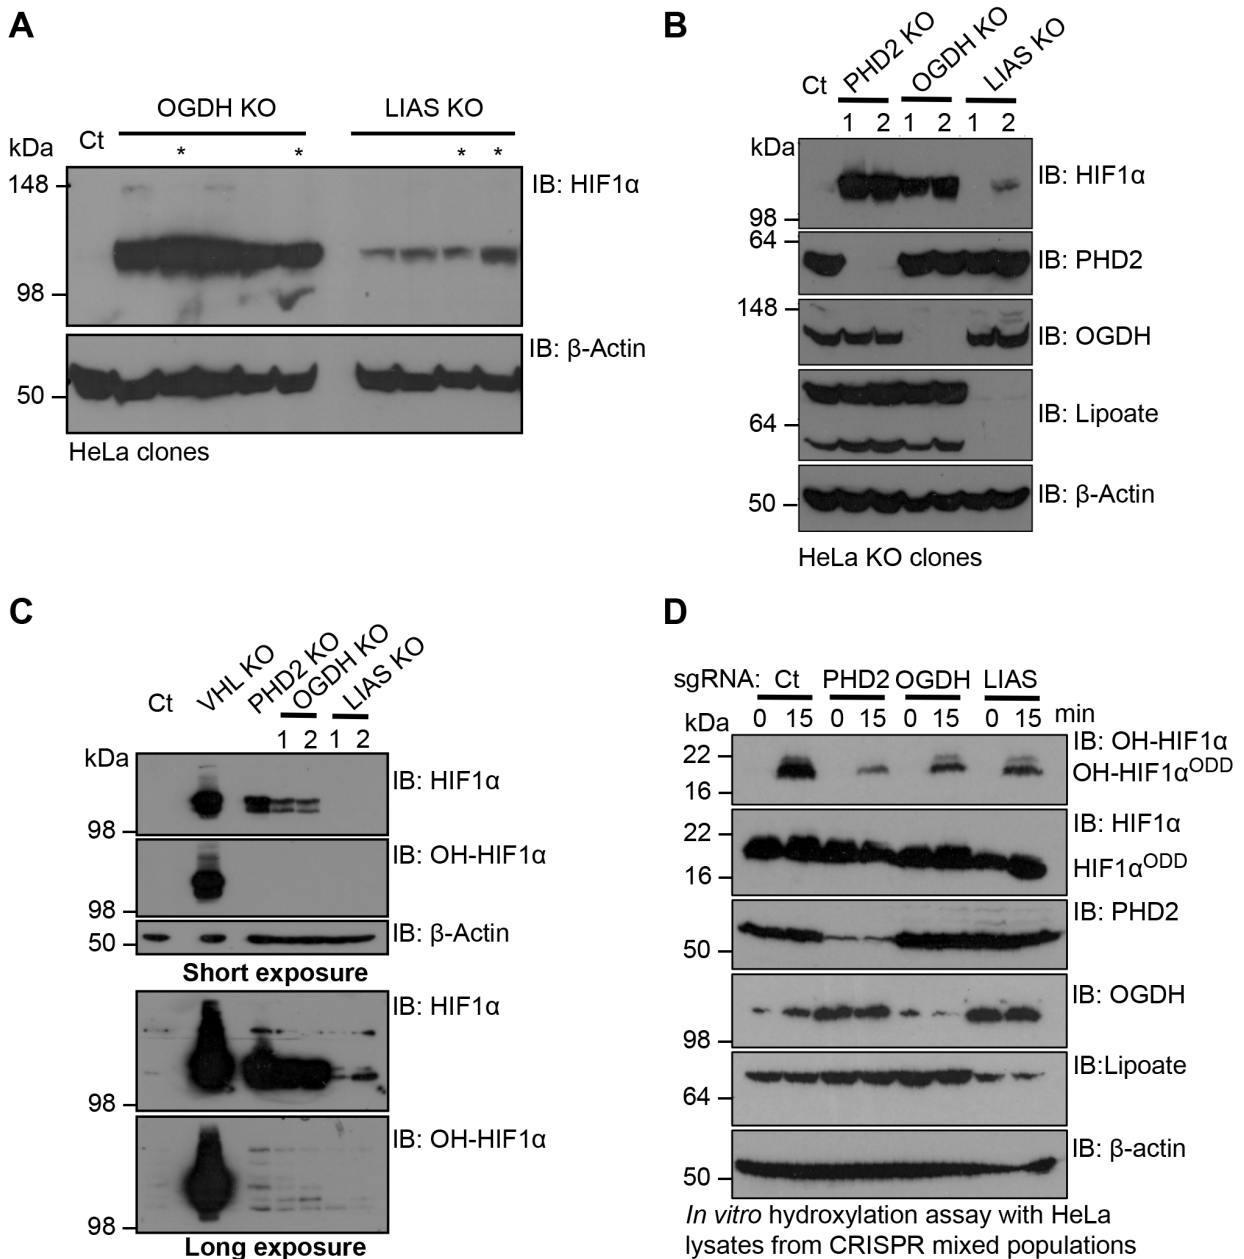

**A-C**, PHD2, OGDH and LIAS null cells were isolated from HeLa cells transduced with Cas9 and specific sgRNAs by serial dilution cloning. Immunoblot showing HIF1α levels in several OGDH and LIAS sgRNA target clones (**A**). Confirmation that two representative KO clones for each gene (\* in **A**) are deficient for OGDH and LIAS (**B**). Hydroxylated HIF1α levels in the PHD2, OGDH or LIAS null clones measured by hydroxy-HIF1α specific antibody (**C**). **D**, *In vitro* hydroxylation of the HIF1α<sup>ODD</sup> protein using HeLa cell extracts from PHD2, OGDH and LIAS CRISPR-Cas9 targeted populations.

**Figure S4: Metabolic analysis of PHD2, OGDH and LIAS deletion in HeLa cells and their effect on pyruvate metabolism (related to Figure 4).**

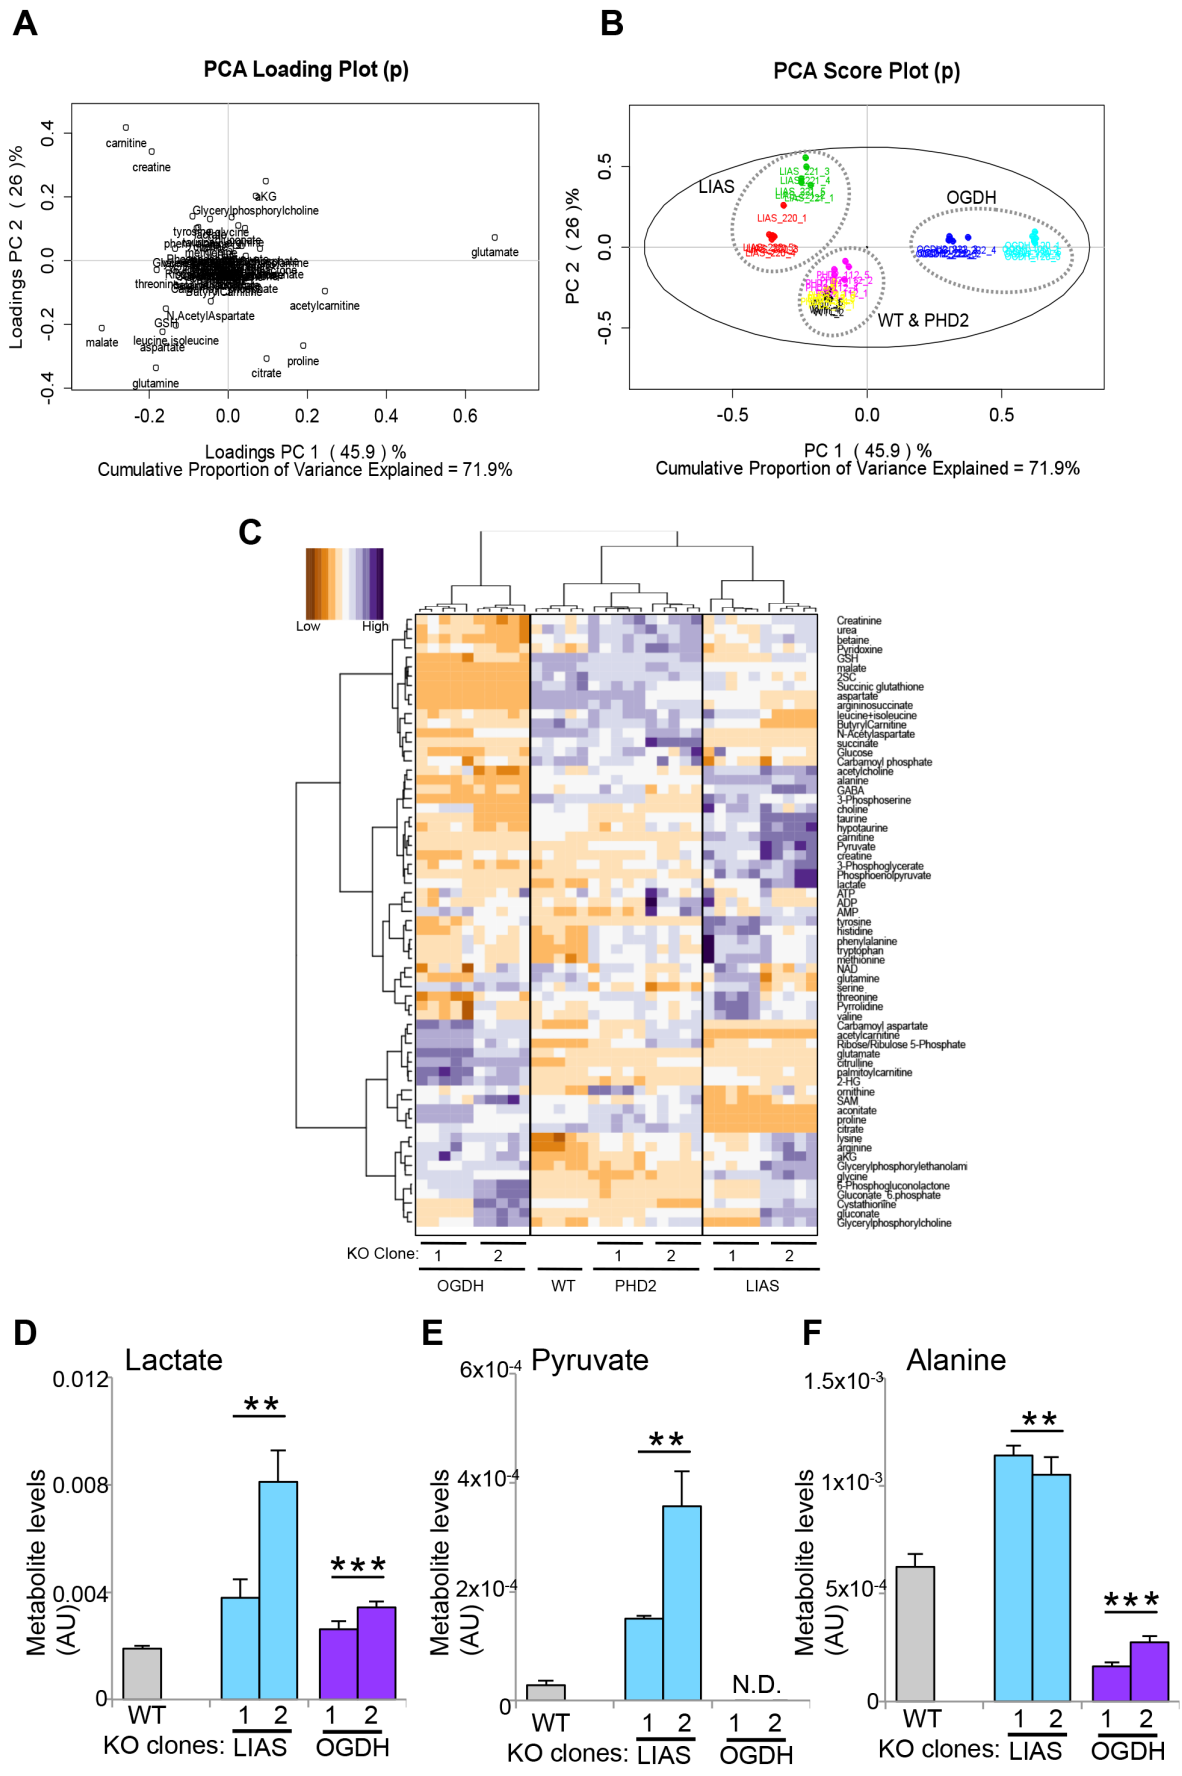

**A**, Principal Components Analysis loading plot of intracellular polar metabolites contributing to separate HeLa cell extracts from PHD2, OGDH and LIAS CRISPR-Cas9 targeted populations. **B**, Score plot of each five replicates per clone and condition (colour coded) from one experiment. 'Variance Explained' refers to the percentage of total variation observed between samples that can be attributed to separation along a given principal component. **C-E**, Total cellular levels of lactate (**C**), pyruvate (**D**) and alanine (**E**) in wildtype, OGDH KO and LIAS KO HeLa cells measured by LC-MS. Five independent cell cultures were measured for each KO clone, and two KO clones were used for each gene. \*\*P<0.01 WT compared to KO clones, \*\*\*P<0.01 OGDH compared to LIAS null clones. N.D= not detected. **C**, Unsupervised hierarchical clustering of metabolite levels in the wildtype, PHD2, OGDH and LIAS and KO HeLa clones displayed as a heat map. Two null clones for each OGDH and LIAS KO were used and five independent cell cultures were measured for each KO clone.

**Figure S5: Bioenergetic profiling and Mitochondrial ROS production in HeLa cells depleted for PHD2, OGDH and LIAS (related to Figure 4).**

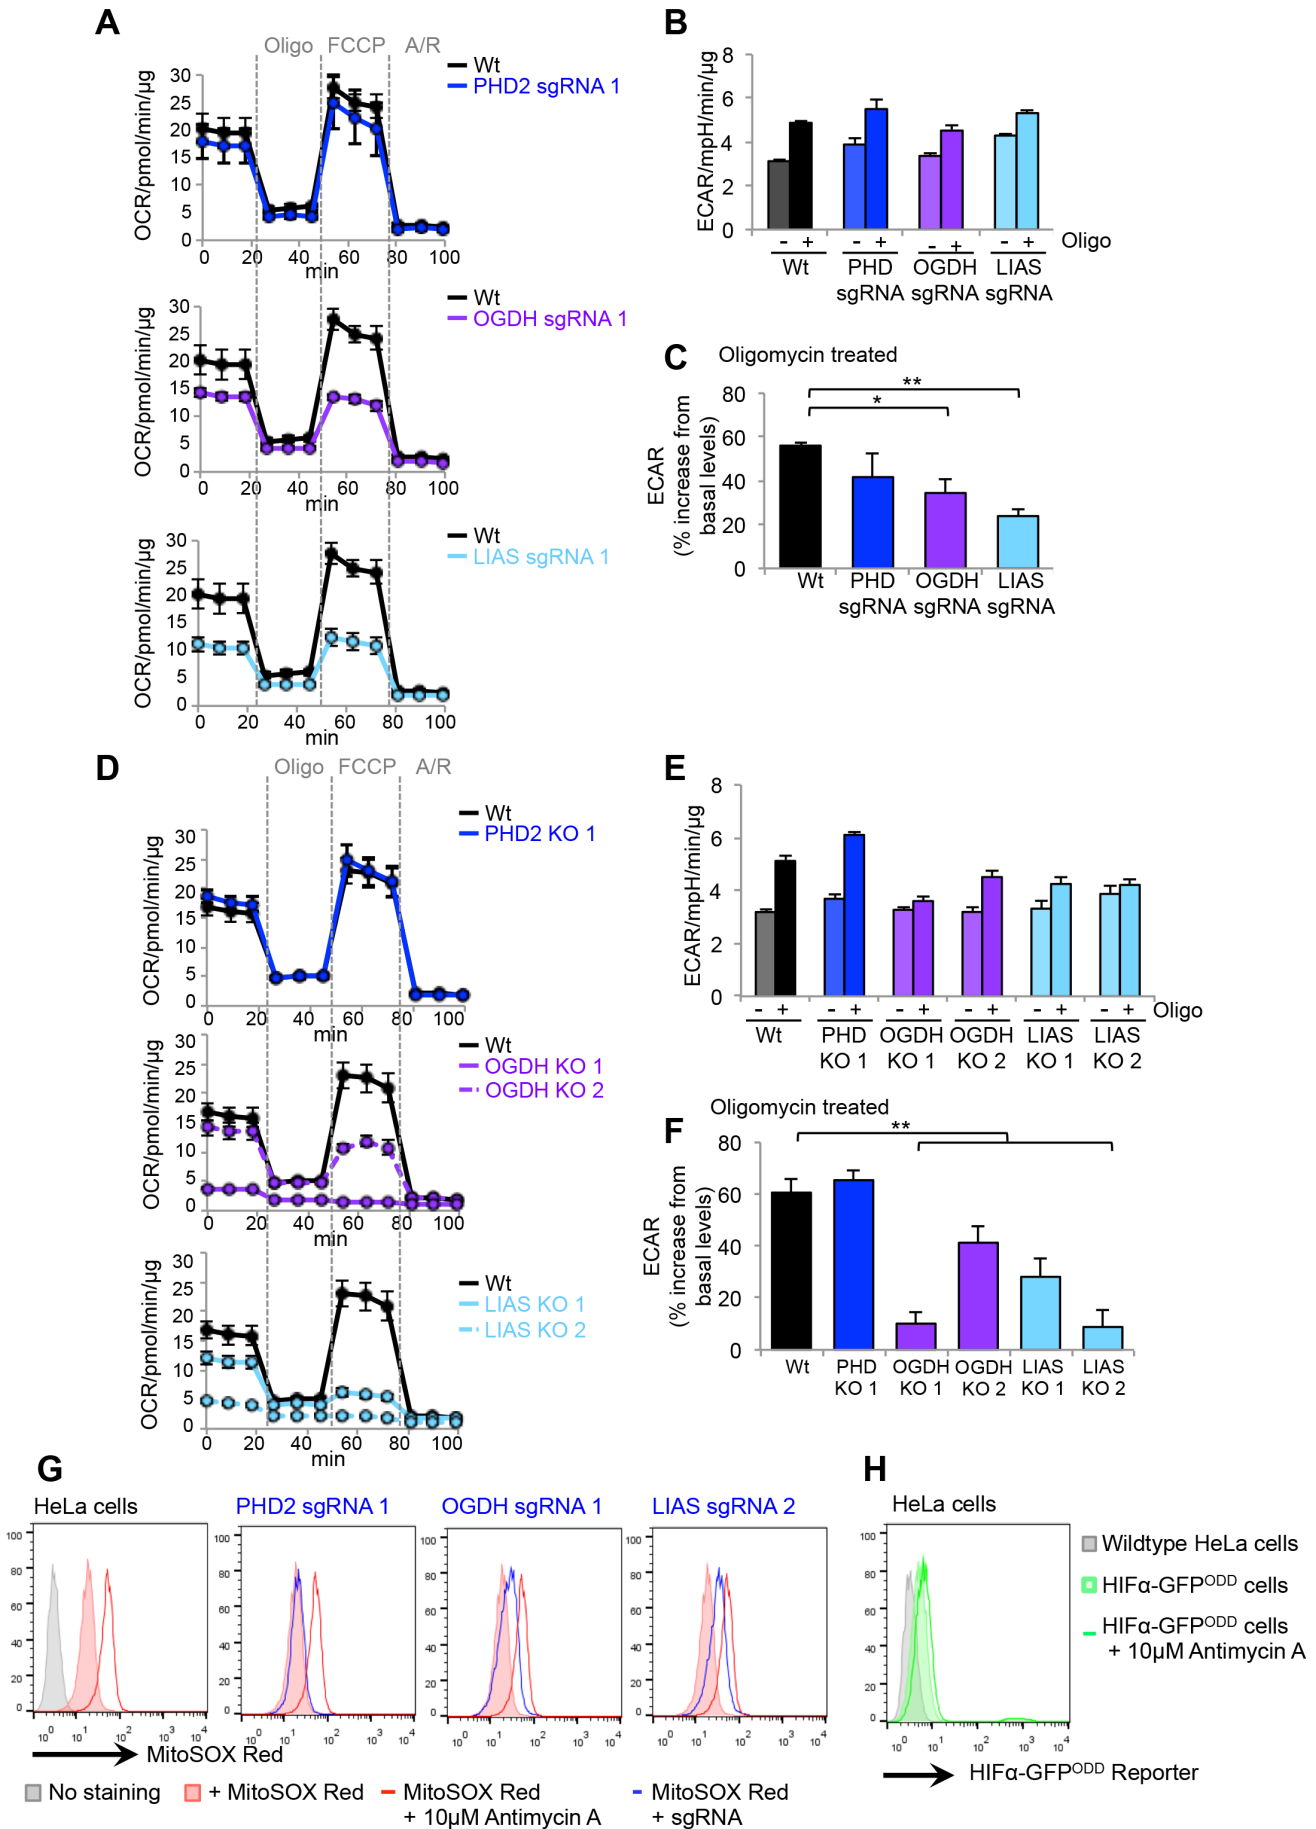



**A-C**, Oxygen consumption rates (OCR) (**A**) and extracellular acidification rates (ECAR) (**B, C**) were measured in HeLa cells depleted for PHD2, OGDH or LIAS. Measurements were performed using a Seahorse XFe24 Extracellular Flux Analyzer (4 technical replicates per sample). Three basal measurements were made at 9 min intervals followed by three measurements per treatment (1 $\mu$ M oligomycin, 1 $\mu$ M FCCP and 1 $\mu$ M antimycin/rotenone). OCR and ECAR were normalised to total cell protein content. ECAR were measured at baseline and following 1 $\mu$ M oligomycin treatment (**B**) and the percentage increase in ECAR following oligomycin measured (**C**). **D-F** OCR (**D**) and ECAR (**E, F**) measured in the PHD2, OGDH and LIAS null clones as described previously (n=3). **G**, HeLa cells were transduced with lentivirus encoding Cas9 and sgRNAs to PHD2, OGDH or LIAS as described previously. After 10 days the cells were stained with MitoSOX Red (Thermo Fisher) and mitochondrial ROS measured by flow cytometry. Treatment with 10 $\mu$ M Antimycin A for 30 minutes was used as a positive control to generate mitochondrial ROS by inhibiting the oxidation of ubiquinone. **H**, HIF1 $\alpha$ -GFP<sup>ODD</sup> cells were treated with 10 $\mu$ M Antimycin A for 12 hours and GFP levels measured by flow cytometry. Mitochondrial ROS generated by treatment with Antimycin A did not stabilise the HIF1 $\alpha$ -GFP<sup>ODD</sup> reporter. Values are mean $\pm$ SEM. \*P<0.05, \*\*P<0.01.

**Figure S6: Disruption of the OGHC leads to decreased PHD and TET activity through a 2-OG dependent increase in L-2-HG (related to Figures 5 and 6).**

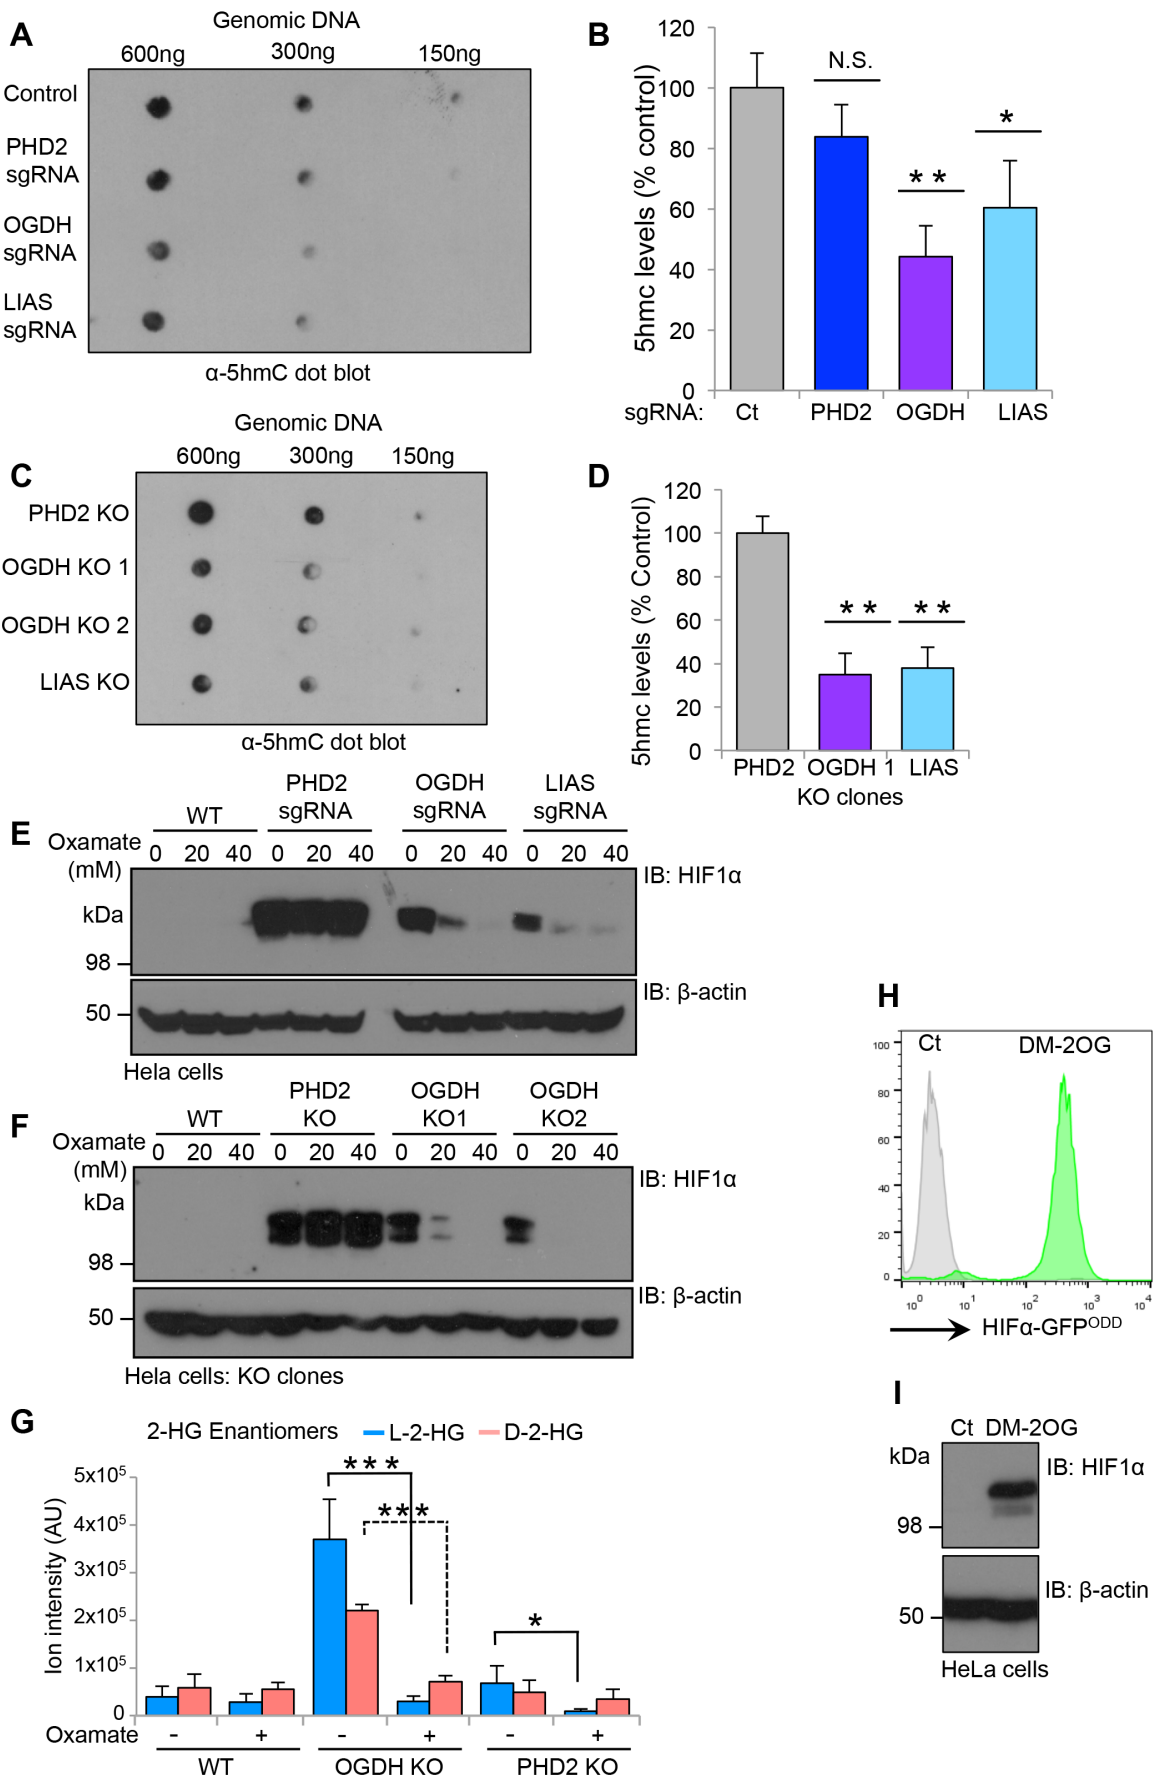

**A, B**, TET enzyme activity in HeLa mixed CRISPR populations depleted of PHD2, OGDH or LIAS populations. Total genomic DNA levels were measured by methylene blue staining, and the relative levels of 5-hmC quantified by densitometry (**B**) n=3. **C, D**, TET enzyme activity in PHD2, OGDH or LIAS null clones measured by probing total genomic DNA for 5-hmC. Total genomic DNA levels were measured by methylene blue staining, and the relative levels of 5-hmC quantified by densitometry (**D**) n=3. **E, F**, HIF1 $\alpha$  levels in oxamate treated wildtype HeLa cells depleted for OGDH, LIAS or PHD2 by sgRNA (**E**) or null clones (**F**) as described. **G**, Levels of 2-HG enantiomers in wildtype, PHD2 or OGDH KO cells following 24 h oxamate treatment (40mM). Chiral derivatisation was used to label L-2-HG and D-2-HG for analysis by LC-MS. Enantiomer levels were measured by ion intensity. n=5. **H, I** HIF1 $\alpha$ -GFP<sup>ODD</sup> reporter or wildtype HeLa cells were treated with 4mM DM2-OG for 24 h and HIF1 $\alpha$  levels visualised by GFP levels (**H**) or immunoblot (**I**). Values are mean $\pm$ SEM. \*P<0.05. \*\*P<0.01. \*\*\*P<0.001 comparing + or - oxamate. N.S.= not significant

**Figure S7: Human germline mutations in lipoxic acid synthesis stabilise HIF1 $\alpha$**  (related to Figure 7).

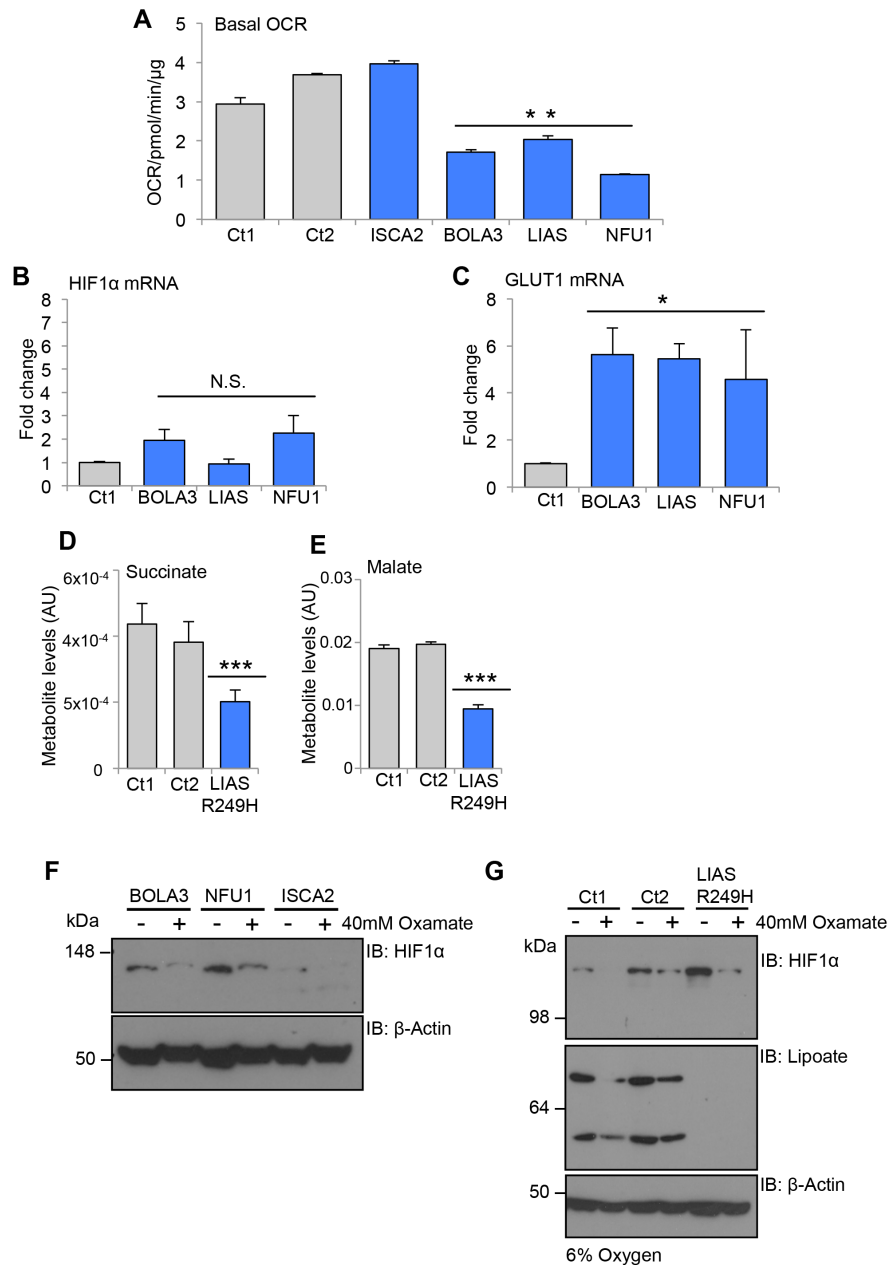

**A**, Basal OCR in patient control and mutant (ISCA2, BOLA3, LIAS and NFU1) fibroblast cells. **B**, **C**, mRNA levels of HIF1 $\alpha$  (**B**) and GLUT1 (**C**) in control fibroblasts or fibroblast from patients with mutations in LIAS or BOLA3 were analysed by qPCR. n=3. **D**, **E**, Relative intracellular abundance of succinate (**D**) and malate (**E**), in control and LIAS R249H mutant fibroblasts measured by LC-MS as described. **F**, HIF1 $\alpha$  levels following oxamate treatment of fibroblasts with homozygous mutations in the Fe-S cluster synthesis genes BOLA3, NFU1 and ISCA2. **G**, Oxamate treatment on control and LIAS mutant fibroblasts in 6% oxygen. Control (Ct) or LIAS R249H fibroblasts were incubated at 6% oxygen and treated with 40mM oxamate for 24 h. HIF1 $\alpha$  and lipocate levels were measured by immunoblot.  $\beta$ -actin served as a loading control. Fibroblasts from two unrelated patients were used as controls. Values are mean $\pm$ SEM.

\*P<0.05, \*\*P<0.01.

**Table S1: Intracellular concentrations of 2-HG** (related to Figures 5-7).

| sample         | 2-HG peak area | extract (umoles/mL) | umoles 2-HG/cell | 2-HG/cell volume (uM) | Mean       | SD         |
|----------------|----------------|---------------------|------------------|-----------------------|------------|------------|
| HeLa control 1 | 5.46E+07       | 7.46E-04            | 7.46E-10         | 169                   |            |            |
| HeLa control 2 | 5.44E+07       | 7.44E-04            | 7.44E-10         | 168                   |            |            |
| HeLa control 3 | 6.34E+07       | 8.34E-04            | 8.34E-10         | 189                   |            |            |
| HeLa control 4 | 5.06E+07       | 7.06E-04            | 7.06E-10         | 160                   |            |            |
| HeLa control 5 | 4.76E+07       | 6.76E-04            | 6.76E-10         | 153                   | <b>168</b> | <b>13</b>  |
| OGDH KO 1      | 3.07E+08       | 3.27E-03            | 3.27E-09         | 651                   |            |            |
| OGDH KO 2      | 3.19E+08       | 3.39E-03            | 3.39E-09         | 676                   |            |            |
| OGDH KO 3      | 3.29E+08       | 3.49E-03            | 3.49E-09         | 696                   |            |            |
| OGDH KO 4      | 3.02E+08       | 3.22E-03            | 3.22E-09         | 642                   |            |            |
| OGDH KO 5      | 3.28E+08       | 3.48E-03            | 3.48E-09         | 694                   | <b>672</b> | <b>24</b>  |
| HeLa DM2-OG 1  | 1.79E+08       | 1.99E-03            | 1.99E-09         | 449                   |            |            |
| HeLa DM2-OG 2  | 4.98E+08       | 5.18E-03            | 5.18E-09         | 1173                  |            |            |
| HeLa DM2-OG 3  | 5.42E+08       | 5.62E-03            | 5.62E-09         | 1272                  |            |            |
| HeLa DM2-OG 4  | 4.59E+08       | 4.79E-03            | 4.79E-09         | 1084                  |            |            |
| HeLa DM2-OG 5  | 3.88E+08       | 4.08E-03            | 4.08E-09         | 922                   | <b>980</b> | <b>323</b> |

Table showing the mass spectrometry quantification of 2-HG performed by interpolation of the corresponding standard curve obtained from serial dilutions of DL-alpha-hydroxyglutaric acid disodium salt. Five replicates per experimental condition were performed. Cell volumes were measured by to calculate the final 2-HG concentrations (mean±SD).

## EXPERIMENTAL PROCEDURES

### *Metabolomic analyses*

Liquid Chromatography Mass Spectrometry (LC-MS) analysis of sample extracts was performed on a QExactive Orbitrap mass spectrometer coupled to Dionex UltiMate 3000 Rapid Separation LC system (Thermo). The liquid chromatography system was fitted with a SeQuant Zic-pHILIC (150mm × 2.1mm, 5µm) with guard column (20mm × 2.1mm, 5µm) from Merck (Darmstadt, Germany). The mobile phase was composed of 20mM ammonium carbonate and 0.1% ammonium hydroxide in water (solvent A), and acetonitrile (solvent B). The flow rate was set at 180µL × min<sup>-1</sup> with the following gradient: 0 min 70% B, 1 min 70% B, 16 min 38% B, 16.5 min 70% B, hold at 70% B for 8.5 min. The mass spectrometer was operated in full MS and polarity switching mode. Five independent cell cultures were measured for each condition and samples were randomised in order to avoid bias in sample analyses due to machine drift. The acquired spectra were analysed using XCalibur Qual Browser and XCalibur Quan Browser software (Thermo Scientific) by referencing to an internal library of compounds. R packages muma and gplots were used for data visualisation.

Quantification of 2-HG performed by interpolation of the corresponding standard curve obtained from serial dilutions of DL-alpha-hydroxyglutaric acid disodium salt (Sigma Aldrich) running with the same batch of samples. Mean cell volume of wildtype and OGDH KO HeLa cells was measured using a CASY cell analyser. Three separate measurements were made for each cell line and averaged to give a final mean cell volume.

Derivatisation of 2-HG metabolite extracts with diacetyl-L-tartaric anhydride (DATAN) was performed as previously described (Oldham et al., 2015; Struys et al., 2004) with some modifications. Briefly, for each sample, 200µl metabolite extract was evaporated to dryness at ambient temperature in a Savant SpeedVac Concentrator (Thermo Scientific). The residue was resuspended in 50µl freshly-mixed 80% acetonitrile/20% acetic acid plus 50mg/ml DATAN (Acros Organics) and heated at 75°C for 30 min. Samples were cooled to room temperature and centrifuged before addition of 50µl 80% acetonitrile/20% acetic acid.

5µL of derivatised sample was injected onto an Acquity UHPLC HSS T3 column (100 × 2.1mm, 1.8µm particle size). A Dionex UltiMate 3000 Rapid Separation LC was coupled to a Q Exactive Orbitrap mass spectrometer, and a gradient elution of 1.5mM ammonium formate in water (mobile phase A, pH 3.6 adjusted with formic acid) and 0.1% formic acid in acetonitrile (mobile phase B) was used to separate the derivatised L- and D-2HG enantiomers. The target analytes were monitored by in parallel-reaction monitoring (PRM) in negative electrospray ionization mode. The transition (precursor ion → product ion) of m/z 363 → 147 for

derivatised D- and L-2-HG was monitored and the accurate mass of 147.03 was extracted using XCalibur Qual Browser and XCalibur Quan Browser software (Thermo Scientific), and used for relative quantification. Experimental samples were randomised in order to avoid bias in sample analyses due to machine drift.

### **Modelling of the OGDHC and lipoic acid synthesis proteins**

All non-experimentally derived models were determined through use of the Phyre2 fold recognition server (Kelley et al., 2015). The E1 subunit, OGDH (Uniprot id Q02218) was submitted to the Phyre2 server and a model was returned matching residues 36-975 (95% coverage), based on *Mycobacterium smegmatis* alpha-ketoglutarate decarboxylase (PDB id 2XT6, 44% sequence identity). The E2 subunit, DLST (Uniprot id P36957), was modelled by considering each of its domains separately and submitting them to the Phyre2 server. Residues 220-451, corresponding to the catalytic domain, were modelled based on the *E. coli* DLST catalytic domain (PDB id 1SCZ, 60% sequence identity). Residues 71-143, corresponding to the lipoyl domain, were modelled on the lipoyl domain of PDH kinase isoform 3 (PDB id 2Q8I, 40% identity). As the OGDHC shares its E3 subunit, DLD, with PDH, a crystal structure of this subunit, in the form of a dimeric biological assembly, was obtained from the PDB (id 1ZMD) and used directly to generate an image. Figures derived from these models were prepared by generating space-filling sphere based images using PyMOL.

Proteins involved in lipoic acid formation were modelled as for the OGDHC, and were generated via the Phyre2 server. ISCA2 (Uniprot id Q86U28) residues 49-153 were modelled on IscA from *Thermosynechococcus elongatus* (PDB id 1X0G, 27% identity). The location of the [2Fe-2S] cluster was copied from that in the template structure by structural alignment using the super PyMOL command. BOLA3 (Uniprot id Q53S33) residues 33-107 were modelled on Bola2 from *Arabidopsis thaliana* (PDB id 2MM9). An NMR model (PDB id 2M50) exists for residues 162-247 of NFU1 and was used directly in visualisation. LIAS residues 70-357 were modelled on lipoyl synthase 2 from *Thermosynechococcus elongatus* (PDB id 4U00). To place the [4Fe-4S] clusters in the human LIAS model, the template and model were aligned to each other with the PyMOL align command and clusters copied to the human model.

### **Bioenergetic Profiling**

OCR and ECAR measurements were performed using a Seahorse XFe24 Extracellular Flux Analyzer. HeLa cells were seeded to Seahorse XFe24 cell culture microplates and 1 h prior to analysis the medium was replaced with unbuffered DMEM (25mM glucose, 2mM L-glutamine, 1mM sodium pyruvate, 2% FCS). Measurements were performed as described by

Nicholls et al (Nicholls et al., 2010) with some modifications. Briefly, three basal OCR and ECAR measurements were taken at 9 min intervals, followed by sequential treatments with 1 $\mu$ M oligomycin, 1 $\mu$ M FCCP and 1 $\mu$ M rotenone/1 $\mu$ M antimycin (three measurements each at 9 min intervals). Following analysis, the cells were lysed in 1% NP40 and the protein content of each well determined by Bradford protein assay to allow normalisation of OCR and ECAR values to cell protein content.

### ***Patient Samples***

Primary human fibroblast cell lines were kindly donated by Dr Johannes Mayr. The following cell lines have been published previously:

- 1) LIAS (NM\_006859.2) c.746G>A (p.Arg249His), homozygous (Mayr et al., 2011).
- 2) BOLA3 (NM\_212552.2) c.200T>A (p.Ile67Asn), homozygous (published as patient #49720) (Haack et al., 2013).
- 3) NFU1 (NM\_001002755.2) c.[544C>T];[?] p.[Arg182Trp];[?]. This patient was investigated for an NFU1 mutation and the mutation c.544C>T was identified (published as patient 3) (Ahting et al., 2015). At the level of genomic DNA this position was found to be heterozygous. All coding exons were sequenced but a second mutation could not be identified. It is most likely the second allele results in an unstable mRNA, probably due to activation of a cryptic intronic splice site.

ISCA2 (NM\_194279.3) c.G229A (p.Gly77Ser), homozygous . This patient with an ISCA2 mutation was born as the first child of healthy consanguineous parents (first degree cousins) of Arabian origin. Initially she showed normal psychomotor progress until the age of 6 months when she had a developmental arrest. She failed to thrive and dropped under the 3rd percentile of head circumference, body length and weight. She developed severe muscular hypotonia, seizures, sensorineural hearing loss, optic atrophy and blindness and lost all her skills. Chronic respiratory failure necessitated tracheostomy and artificial ventilation. She died at the age of 2 years. Laboratory evaluation showed the following significant abnormalities: increased lactate in cerebrospinal fluid (CSF) (8.3 mmol/l, normal 0,8 – 2,5 mmol/l), glycine elevation in plasma (1039  $\mu$ mol/l, normal 73-436 ) and CSF (45  $\mu$ mol/l, normal 2-8). Alanine was elevated in CSF (90  $\mu$ mol/l, normal 13-45). An MRI revealed severe leukodystrophy already at age 7 months showing progression at age 22 months. This mutation has been previously described and seems to be a founder mutation in the Saudi population (Al-Hassnan et al., 2015).



Two fibroblast control cells were used:

C1, This was obtained from a girl with HMGCL deficiency (NM\_000191.2) causing abnormalities in ketone body formation (donated by Dr Mayr).

C2, Female patient obtained as a primary dermal fibroblast commercial sample from Lonza.

### **Plasmids**

Full details of plasmids used are shown below. The majority of viral vectors were pHRSIN-based lentiviral plasmids (Demaison et al., 2002). The HIF1 $\alpha$ -GFP<sup>ODD</sup> reporter was generated by insertion of the HIF1 $\alpha$  ODD (aa 530-603) at the 5' of EGFP in the pHRSIN EGFP vector. The SFFV promoter was substituted for the iNOS HRE minimal promoter region to form the pHRSIN HRE- HIF1 $\alpha$ -GFP<sup>ODD</sup> plasmid. The LentiCRISPRv2 vector system was used for all CRISPR-Cas9 experiments (Sanjana et al., 2014).

| <b>Name</b>                | <b>Transgene</b>   | <b>Source</b>             |
|----------------------------|--------------------|---------------------------|
| pHRSIN-pSFFV-EGFP-pGK-Puro | EGFP               | P. Lehner (Cambridge)     |
| Z-loxP-mCherry             | mCherry gene-trap  | P. Lehner (Cambridge)     |
| pCMVR8.91                  | Lentiviral gag/pol | P. Lehner (Cambridge)     |
| pMD.G                      | Lentiviral VSVG    | P. Lehner (Cambridge)     |
| pMD.GagPol                 | Retroviral gag/pol | P. Lehner (Cambridge)     |
| pMD.VSVG                   | Retroviral VSVG    | P. Lehner (Cambridge)     |
| pCDNA3 HIF1 $\alpha$ HA    | HIF1 $\alpha$      | P. Maxwell (Cambridge)    |
| pGL-HRE                    | iNOS HRE           | S. Rocha (Dundee)         |
| OGDH IMAGE Clone           | OGDH               | Source Bioscience         |
| LIAS IMAGE Clone           | LIAS               | Source Bioscience         |
| LentiCRISPR v2             | sgRNA/CAS9         | F. Zhang (Addgene #52961) |
| gBlocks Gene Fragment      | L2HGDH             | IDT                       |
| gBlocks Gene Fragment      | D2HGDH             | IDT                       |

## Antibodies and Reagents

### Primary Antibodies

| Protein                 | Cat no.     | Company/Source          | Species   |
|-------------------------|-------------|-------------------------|-----------|
| HIF1 $\alpha$           | 610959      | BD Biosciences          | Mouse     |
| Hydroxy-HIF1 $\alpha$   | #3434       | Cell Signaling          | Rabbit    |
| PHD2 (EGLN1)            | NB100-137SS | Novus Biologicals       | Rabbit    |
| OGDH                    | HPA020347   | Atlas                   | Rabbit    |
| Lipoate                 | 437695      | Calbiochem              | Rabbit    |
| $\beta$ -Actin          | A228        | Sigma                   | Mouse     |
| VHL                     | #2738       | Cell Signaling          | Rabbit    |
| LDHA                    | #2012       | Cell Signaling          | Rabbit    |
| MHC Class I (W6/32)     |             | P. Lehner (Cambridge)   | Mouse     |
| $\beta$ 2 microglobulin | A00072      | Dako                    | Rabbit    |
| CA9 (M75)               |             | E. Oosterwijk (Radboud) | Mouse     |
| Malate dehydrogenase 1  | NBP1-89515  | Novus Biologicals       | Rabbit    |
| Malate dehydrogenase 2  | AB96193     | Abcam                   | Rabbit    |
| L2HGDH                  | 15707-1-AP  | Proteintech             | Rabbit    |
| D2HGDH                  | 13895-1-AP  | Proteintech             | Rabbit    |
| 5-Hydroxymethylcytosine | 39770       | Active Motif            | Rabbit    |
| Goat Anti-rabbit        | HRP         | 111-035-045             | Jackson   |
| Goat Anti-mouse         | AF488       | A11029                  | Life Tech |
| Goat Anti-rabbit        | AF488       | A11034                  | Life Tech |
| Goat Anti-mouse         | AF568       | A11031                  | Life Tech |
| Goat Anti-rabbit        | AF568       | A11036                  | Life Tech |
| Goat Anti-mouse         | AF647       | A21236                  | Life Tech |
| Goat Anti-rabbit        | AF647       | A21245                  | Life Tech |

### CRISPR sgRNAs

| Target Gene             | Guide no. | sgRNA sequence        |
|-------------------------|-----------|-----------------------|
| PHD2                    | 1         | ATGCCGTGCTTGTTTCATGCA |
| VHL                     | 1         | GCCGTCGAAGTTGAGCCATA  |
| $\beta$ 2 microglobulin | 1         | GGCCGAGATGTCTCGCTCCG  |
| OGDH                    | 1         | CTGCTCTTACCTCCAGCCGA  |
|                         | 2         | TTCCTGTCCCCCGATGAAAG  |
| LIAS                    | 1         | TTAGGTTAAGACTACCTCCA  |
|                         | 2         | GAAGCTCGATGTCCCAATAT  |
| DLST                    | 1         | AGCCTACCAGGTTTGCCAGA  |
|                         | 2         | TGCAGGGGTCTCCTTATGCC  |
|                         | 3         | TACACAACCTTCTGCTGTT   |
| DLD                     | 1         | TGATCTGCGTAAGTTCTCAG  |
|                         | 2         | ATAGCAGCAACATATCCTCC  |
|                         | 3         | TGTGGTAGTATCTATGCCAT  |

## siRNAs

| Target Gene | Oligo no. | siRNA sequence      |
|-------------|-----------|---------------------|
| LDHA        | 1         | GGAGAAAGCCGUCUAAUU  |
|             | 2         | GGCAAAGACUAUAAUGUAA |
|             | 3         | UAAGGGUCUUUACGGAAUA |
|             | 4         | AAAGUCUUCUGAUGUCAUA |
| MDH1        | 1         | CCUUAGAUAUUACGCCAA  |
|             | 2         | GGGAGAAUUUGUCACGACU |
|             | 3         | CAACAGAUAAAGAAGACGU |
|             | 4         | AGGUUAUUGUUGGGUAA   |
| MDH2        | 1         | GGGUUUGGAUCCAGCUCGA |
|             | 2         | GAUCUGAGCCACAUCGAGA |
|             | 3         | CGGAGGUGGUCAAGGCUAA |
|             | 4         | CGCCUGACCCUCUAUGAUA |

| Reagent                             | Cat No.        | Company                        |
|-------------------------------------|----------------|--------------------------------|
| (D)-2-Hydroxyglutarate              | H8378          | Sigma-Aldrich                  |
| (L)-2-Hydroxyglutarate              | 90790          | Sigma-Aldrich                  |
| 13C5 L-glutamine                    | CLM-1822-H-MPT | Cambridge Isotope Laboratories |
| Accuprime Taq                       | 12339-016      | Life Tech                      |
| Agencourt AMPure XP beads           | A63880         | Beckman Coulter                |
| Antimycin                           | A8674          | Sigma-Aldrich                  |
| DATAN                               | 6283-74-5      | Acros Organics                 |
| $\alpha$ -ketoglutaric acid         | K1128          | Sigma-Aldrich                  |
| DMOG                                | D3695          | Sigma-Aldrich                  |
| FCCP                                | sc-203578      | Santa Cruz                     |
| HEPES                               | H0887          | Sigma-Aldrich                  |
| M280 Streptavidin Dynabeads         | 11205D         | Thermo Fisher                  |
| MitoSOX Red                         | M36008         | Thermo Fisher                  |
| Oligofectamine transfection reagent | 12252011       | Thermo Fisher                  |
| Oligomycin                          | 75351          | Sigma-Aldrich                  |
| Polybrene                           | H9268          | Sigma-Aldrich                  |
| Prolong-Gold Antifade with DAPI     | #8961          | Cell Signalling                |
| Propidium Iodide                    | P4864          | Sigma-Aldrich                  |
| Rotenone                            | R8875          | Sigma-Aldrich                  |
| Sodium L-Lactate                    | 71718          | Sigma-Aldrich                  |
| Sodium Oxamate                      | O2751          | Sigma-Aldrich                  |
| Trans-IT 293 reagent                | MIR 2700       | Mirus                          |
| VEGF DuoSet ELISA                   | DY293B         | R&D Systems                    |

## References:

- Ahting, U., Mayr, J.A., Vanlander, A.V., Hardy, S.A., Santra, S., Makowski, C., Alston, C.L., Zimmermann, F.A., Abela, L., Plecko, B., et al. (2015). Clinical, biochemical, and genetic spectrum of seven patients with NFU1 deficiency. *Frontiers in genetics* 6, 123.
- Al-Hassnan, Z.N., Al-Dosary, M., Alfadhel, M., Faqeih, E.A., Alsagob, M., Kenana, R., Almass, R., Al-Harazi, O.S., Al-Hindi, H., Malibari, O.I., et al. (2015). ISCA2 mutation causes infantile neurodegenerative mitochondrial disorder. *Journal of medical genetics* 52, 186-194.
- Demaison, C., Parsley, K., Brouns, G., Scherr, M., Battmer, K., Kinnon, C., Grez, M., and Thrasher, A.J. (2002). High-level transduction and gene expression in hematopoietic repopulating cells using a human immunodeficiency [correction of immunodeficiency] virus type 1-based lentiviral vector containing an internal spleen focus forming virus promoter. *Human gene therapy* 13, 803-813.
- Haack, T.B., Rolinski, B., Haberberger, B., Zimmermann, F., Schum, J., Strecker, V., Graf, E., Ahting, U., Hoppen, T., Wittig, I., et al. (2013). Homozygous missense mutation in BOLA3 causes multiple mitochondrial dysfunctions syndrome in two siblings. *Journal of inherited metabolic disease* 36, 55-62.
- Kelley, L.A., Mezulis, S., Yates, C.M., Wass, M.N., and Sternberg, M.J. (2015). The Phyre2 web portal for protein modeling, prediction and analysis. *Nature protocols* 10, 845-858.
- Mayr, J.A., Zimmermann, F.A., Fauth, C., Bergheim, C., Meierhofer, D., Radmayr, D., Zschocke, J., Koch, J., and Sperl, W. (2011). Lipoic acid synthetase deficiency causes neonatal-onset epilepsy, defective mitochondrial energy metabolism, and glycine elevation. *American journal of human genetics* 89, 792-797.
- Nicholls, D.G., Darley-Usmar, V.M., Wu, M., Jensen, P.B., Rogers, G.W., and Ferrick, D.A. (2010). Bioenergetic profile experiment using C2C12 myoblast cells. *Journal of visualized experiments : JoVE*.
- Oldham, W.M., Clish, C.B., Yang, Y., and Loscalzo, J. (2015). Hypoxia-Mediated Increases in L-2-hydroxyglutarate Coordinate the Metabolic Response to Reductive Stress. *Cell metabolism* 22, 291-303.
- Sanjana, N.E., Shalem, O., and Zhang, F. (2014). Improved vectors and genome-wide libraries for CRISPR screening. *Nature methods* 11, 783-784.
- Struys, E.A., Jansen, E.E., Verhoeven, N.M., and Jakobs, C. (2004). Measurement of urinary D- and L-2-hydroxyglutarate enantiomers by stable-isotope-dilution liquid chromatography-tandem mass spectrometry after derivatization with diacetyl-L-tartaric anhydride. *Clin Chem* 50, 1391-1395.
